# Supplementary material for: Engineering Fe-doped highly oxygenated solvothermal carbon from glucose-based eutectic system as active microcleaner and efficient carbocatalyst
Source: Royal Society of Chemistry journal article supplement (doi:10.1039/c9ta00006b), 2019-01-01
Supplement: c9ta00006b1.pdf [file c9ta00006b1.pdf]

*“Electronic Supplementary Information (ESI) submitted to RSC”*

## **Engineering Fe-doped highly oxygenated solvothermal carbon from glucose based eutectic system as active microcleaner and efficient carbocatalyst**

Manohara H. M.,<sup>a</sup> Supratim Chakraborty,<sup>a</sup> Kanakaraj A.,<sup>a</sup> Debasis Ghosh,<sup>a</sup> Nripat Singh,<sup>b</sup> Kamalesh Prasad,<sup>b</sup> D. Kalpana,<sup>c</sup> S. K. Nataraj<sup>a\*</sup> and Dibyendu Mondal,<sup>a\*</sup>

<sup>a</sup>*Centre for Nano & Material Science, JAIN (deemed to be University), Jain Global Campus, Bangalore-562112, India*

<sup>b</sup>*Natural Products & Green Chemistry Division, CSIR-Central Salt & Marine Chemicals Research Institute, G. B Marg, Bhavnagar-364002 (Gujarat), India*

<sup>c</sup>*Central Electrochemical Research Institute-Madras unit, CSIR Madras Complex, Taramani, Chennai - 600 113, India*

*\* Corresponding authors: [m.dibyendu@jainuniversity.ac.in](mailto:m.dibyendu@jainuniversity.ac.in); [dmtapu@gmail.com](mailto:dmtapu@gmail.com); [sk.nataraj@jainuniversity.ac.in](mailto:sk.nataraj@jainuniversity.ac.in)*

**Table S1.** Sample Coding of prepared samples with different reaction conditions

| Sl. No. | Precursors                       | Reaction Condition | Code  |
|---------|----------------------------------|--------------------|-------|
| 01      | EM + 0.5M FeSO <sub>4</sub>      | 05 hours, 180 °C   | STC-1 |
| 02      | EM + 0.5M FeSO <sub>4</sub>      | 05 hours, 200 °C   | STC-2 |
| 03      | EM + 0.5M FeSO <sub>4</sub>      | 05 hours, 220 °C   | STC-3 |
| 04      | EM + 0.5M FeSO <sub>4</sub>      | 10 hours, 200 °C   | STC-4 |
| 05      | EM + 0.5M FeSO <sub>4</sub>      | 15 hours, 200 °C   | STC-5 |
| 06      | EM only                          | 05 hours, 200 °C   | STC-6 |
| 07      | Glucose + 0.5M FeSO <sub>4</sub> | 05 hours, 200 °C   | STC-7 |

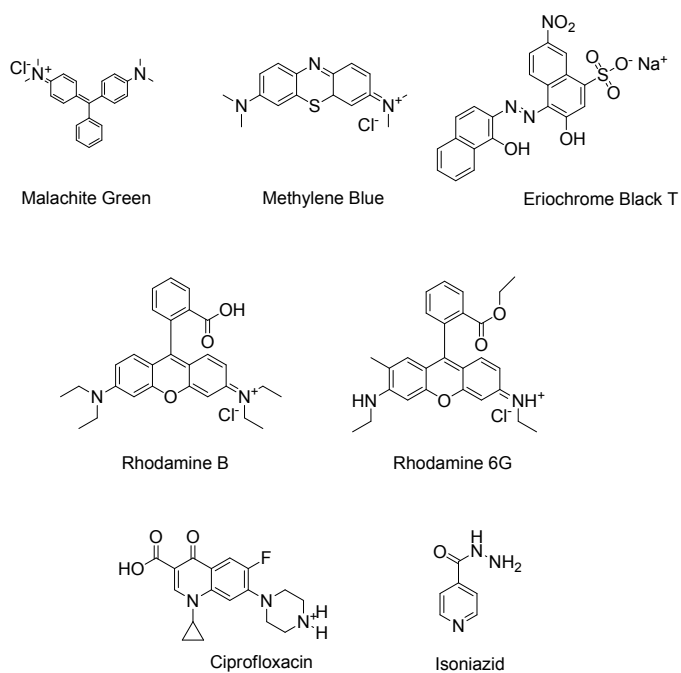

**Figure S1.** Chemical structures of all the dyes and drugs used in the present study.

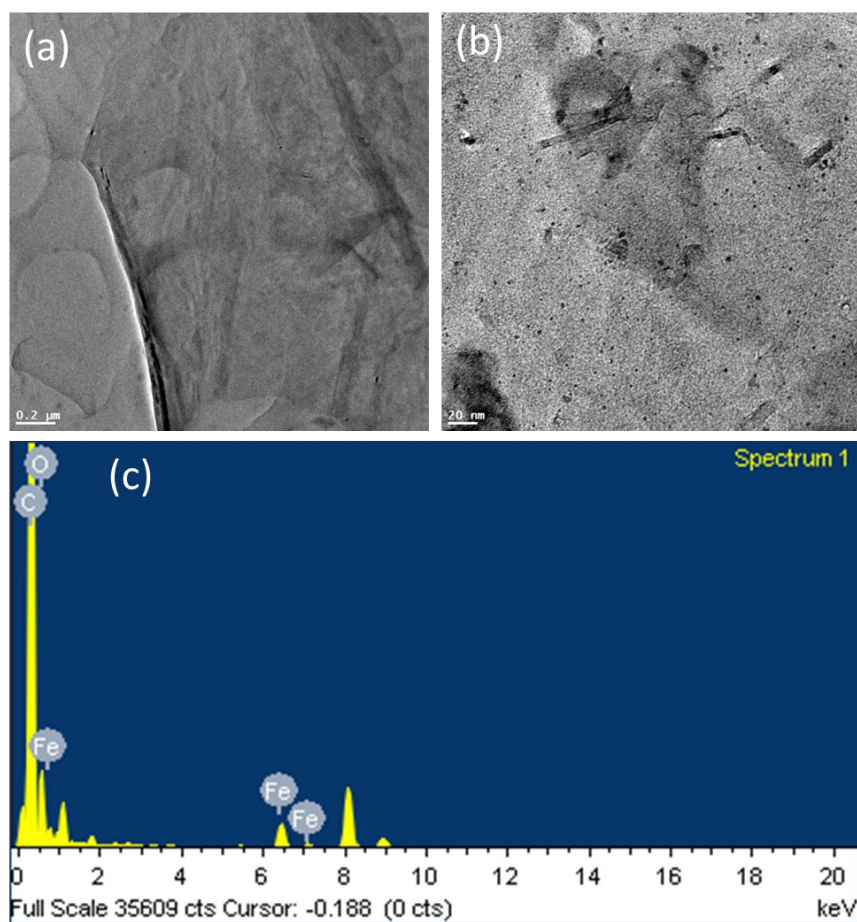

**Figure S2:** TEM images (a-b) and EDX spectra (c) of STC-2

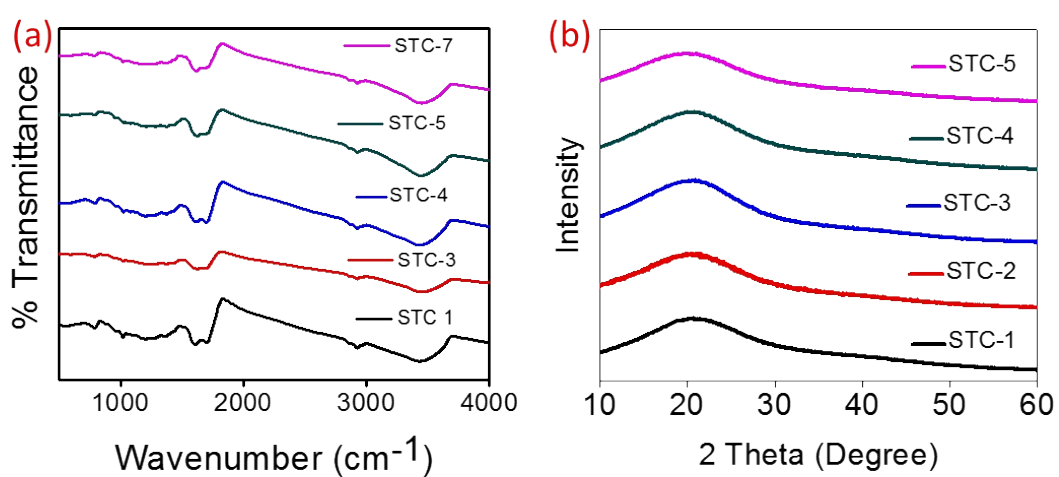

**Figure S3:** (a) FT-IR spectra and (b) XRD spectra of prepared solvothermal carbons.

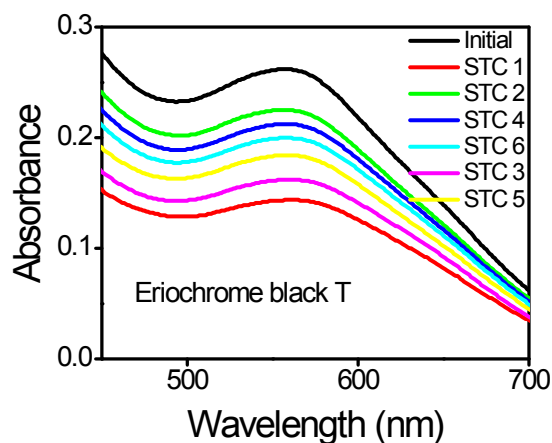

**Figure S4.** UV spectra showing performance of all prepared microcleaners for EBT obtained through batch adsorption method.

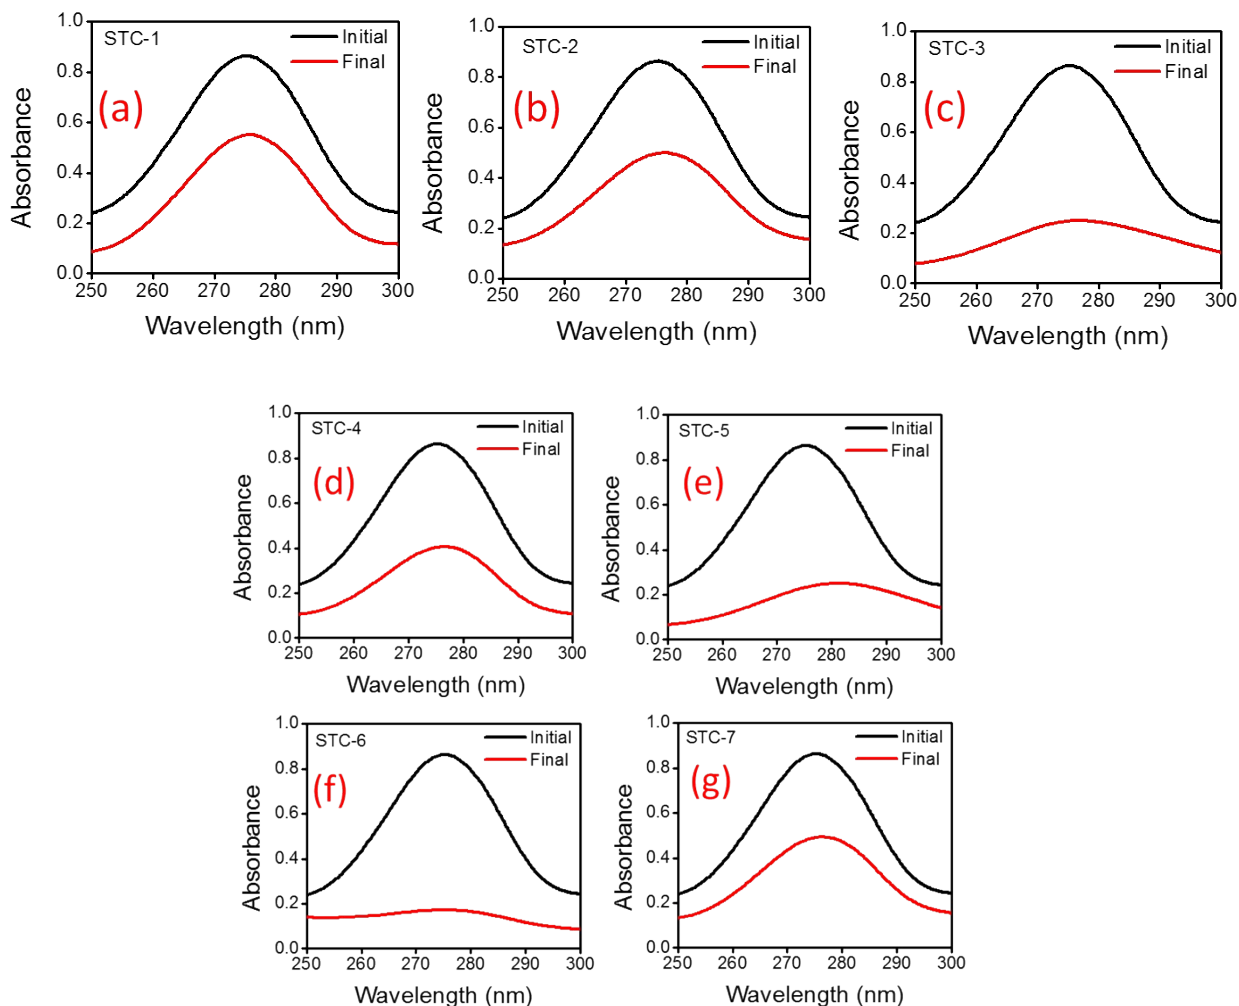

**Figure S5.** UV spectra showing performance of all prepared microcleaners STC 1-7 (a-g respectively) for Ciprofloxacin drug.

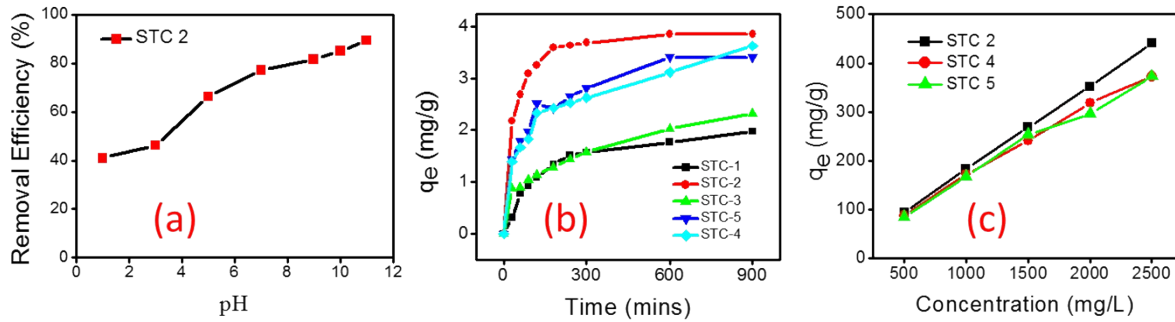

**Figure S6.** (a) Effect of initial solution pH on the adsorption of MG onto the material STC-2 microcleaner, (b) Results of time dependent study carried out using microcleaners prepared at different reaction time and temperature, (c) Effect of initial MG dye concentration on the adsorption onto the STC-2, STC-4 and STC-5 microcleaners.

### Adsorption Isotherm

Langmuir isotherm is based on the assumption that adsorption happens at identical adsorption sites within a homogeneous adsorbent surface, which can be given by Eq. (1)<sup>1</sup>

$$\left(\frac{C_e}{q_e}\right) = \left(\frac{1}{q_m \cdot K_L}\right) + \left(\frac{C_e}{q_m}\right) \quad \text{_____}(1)$$

Where,  $q_m$  (mg/g) represents the maximum adsorption capacity, and  $K_L$  (L/mg) is the equilibrium constant related to adsorption energy. On the other hand, Freundlich isotherm is based on the assumption of heterogeneous surface energy. The expression can be given by the following Eq. (2)<sup>1</sup>

$$\ln q_e = \ln K_F + \left(\frac{\ln C_e}{n}\right) \quad \text{_____}(2)$$

Here,  $K_F$  and  $n$  are Freundlich constants related to adsorption capacity and adsorption tendency, respectively.  $n$  gives an indication of how favourable the adsorption process, while the value of  $1/n$  is indicative of the relative energy distribution on the adsorbent surface and  $K_F$  ( $\text{mg}^{1-1/n} \text{L}^{1/n} \text{g}^{-1}$ ) is defined as the adsorption or distribution coefficient.

For the isotherm studies, drug concentration of 500 mg/L – 2500 mg/L was chosen with 50 mg material. Using above relations, the fitted adsorption isotherms (Figure S6) for the two selected models. All model equilibrium isotherm constants and correlation coefficients

obtained from linear fits of Langmuir and Freundlich isotherms were calculated and illustrating that the correlation coefficient of the Freundlich model ( $R^2 = 0.995$ ) is higher than that of the Langmuir model, indicating that the adsorption of MG onto adsorbents are fitted by the Freundlich isotherm reasonably better.

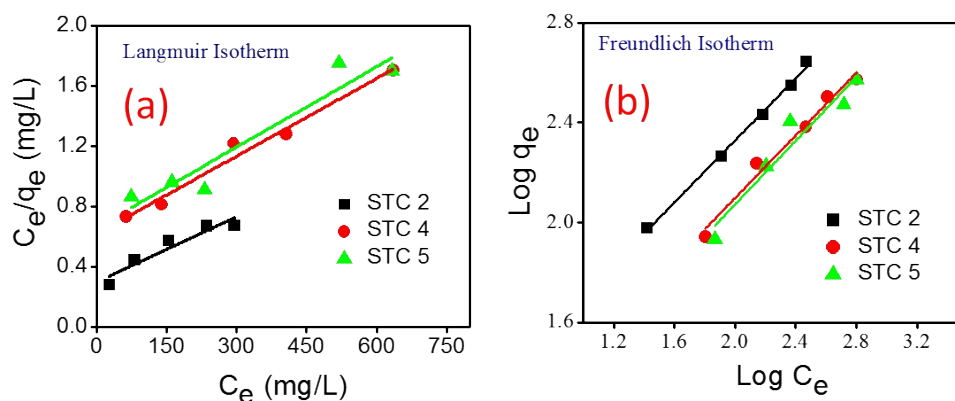

**Figure S7.** (a) Langmuir and (b) Freundlich adsorption isotherm of MG adsorbed on to the microcleaners prepared at different reaction time respectively.

**Table S2.** Removal performance of chemical hazardous molecules through material bed made using 50 mg of STC-2 active microcleaner.

| Sl. No. | Material                                           | Synthesis                                    | $q_{\max}$ (mg g <sup>-1</sup> ) | Ref.         |
|---------|----------------------------------------------------|----------------------------------------------|----------------------------------|--------------|
| 1       | Norit                                              | Commercial                                   | 42                               | 2            |
| 2       | fructose + LiCl-ZnCl <sub>2</sub> salt mixture     | Solvothermal treatment<br>180 °C             | 83                               | 2            |
| 3       | Graphene/Fe <sub>3</sub> O <sub>4</sub> hybrids    | Hydrothermal treatment at<br>180°C for 6 h   | 73.26                            | 3            |
| 4       | Carbon supported Montmorillonite clay              | Hydrothermal treatment at<br>180°C for 6 h   | 194.2                            | 4            |
| 5       | Amino-functionalized attapulgite clay nanoparticle | Hydrothermal treatment at<br>180 °C for 24 h | 215.73                           | 5            |
| 6       | STC-2                                              | Solvotherma treatment<br>200 °C, 5h          | 689.7                            | Present Work |

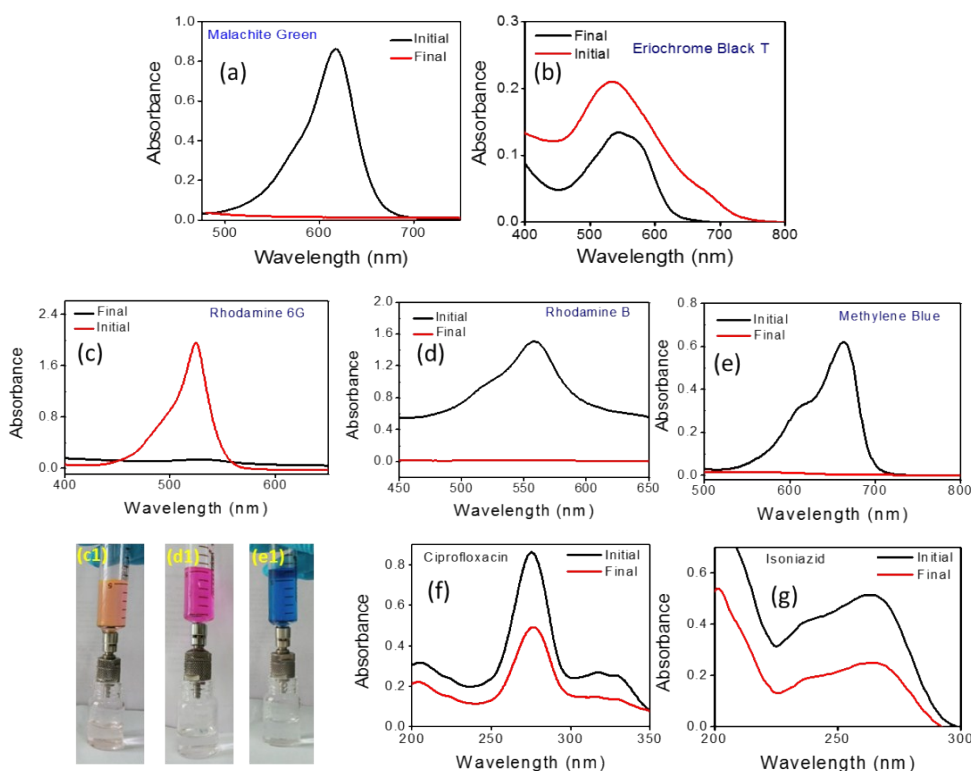

**Figure S8.** UV spectra showing the performance of STC-2 microcleaners for the removal of (a) MG and (b) EBT, (c) Rh 6G, (d) Rh B, and (e) MB dyes removal where as c1, d1 and e1 showing digital photograph of filtration setup with >99% pollutant removed permeate and then, UV spectra for Cpf (f) and Isoniazid (g) drugs removed through membrane filtration method.

**Table S3.** Removal performance of chemical hazardous molecules through material bed made using 50 mg of STC-2 active microcleaner.

| Organic Pollutant  | Nature of substance | Concentration | Flux ( $L h^{-1} m^{-2}$ ) | Rejection |
|--------------------|---------------------|---------------|----------------------------|-----------|
| Malachite Green    | Cationic Dye        | 20 ppm, 5mL   | 602.87                     | 99.9      |
| Rhodamine B        | Cationic Dye        | 20 ppm, 5mL   | 567.06                     | 98.3      |
| Rhodamine 6G       | Cationic Dye        | 20 ppm, 5mL   | 584.42                     | 99.6      |
| Methylene Blue     | Cationic Dye        | 20 ppm, 5mL   | 550.70                     | 96.6      |
| Ciprofloxacin      | Cationic Drug       | 20 ppm, 5mL   | 590.44                     | 59.63     |
| Isoniazid          | Neutral Drug        | 20 ppm, 5mL   | 545.45                     | 48.78     |
| Eriochrome Black T | Anionic Dye         | 10 ppm, 5mL   | 615.84                     | 19.62     |

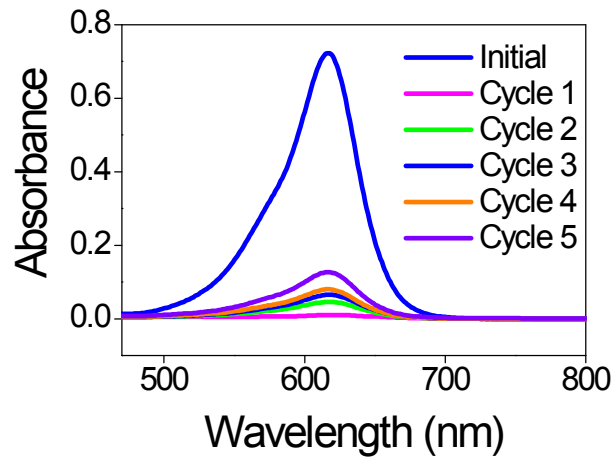

**Figure S9:** UV-vis spectra obtained during recycle study using membrane like filtration method for MG dye from STC-2 material

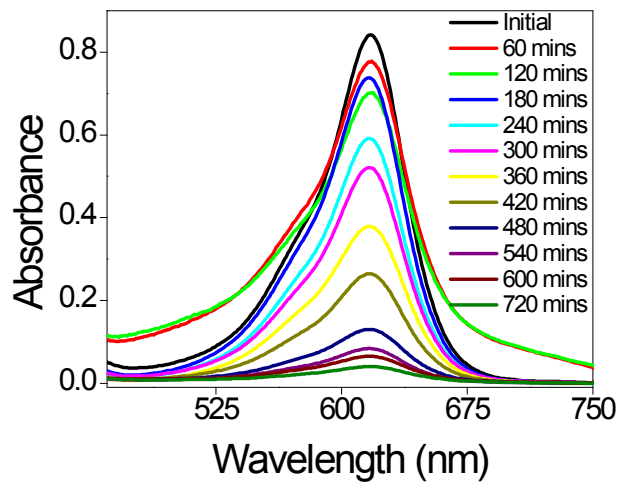

**Figure S10:** UV-vis spectra of degradation of MG dye at different time intervals.

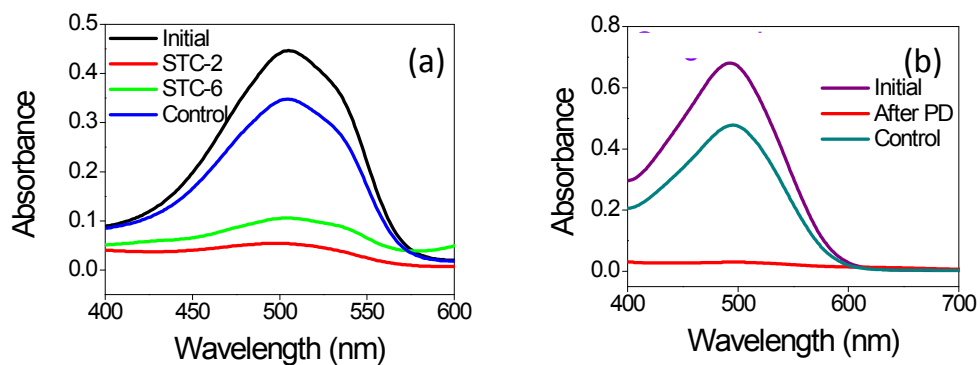

**Figure 11:** UV-vis spectra obtained after photocatalytic degradation of (a) methyl orange using STC-2, STC-6 material and in control condition (b) congo red using STC-2 material and in control condition



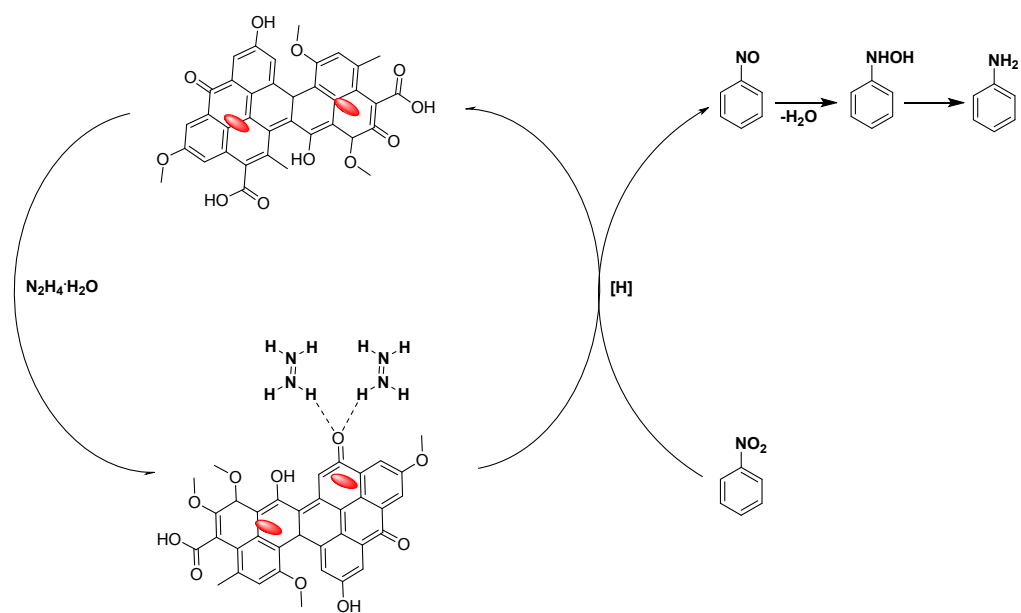

**Figure S12.** Plausible mechanism for carbocatalysis using prepared STCs.<sup>6</sup>

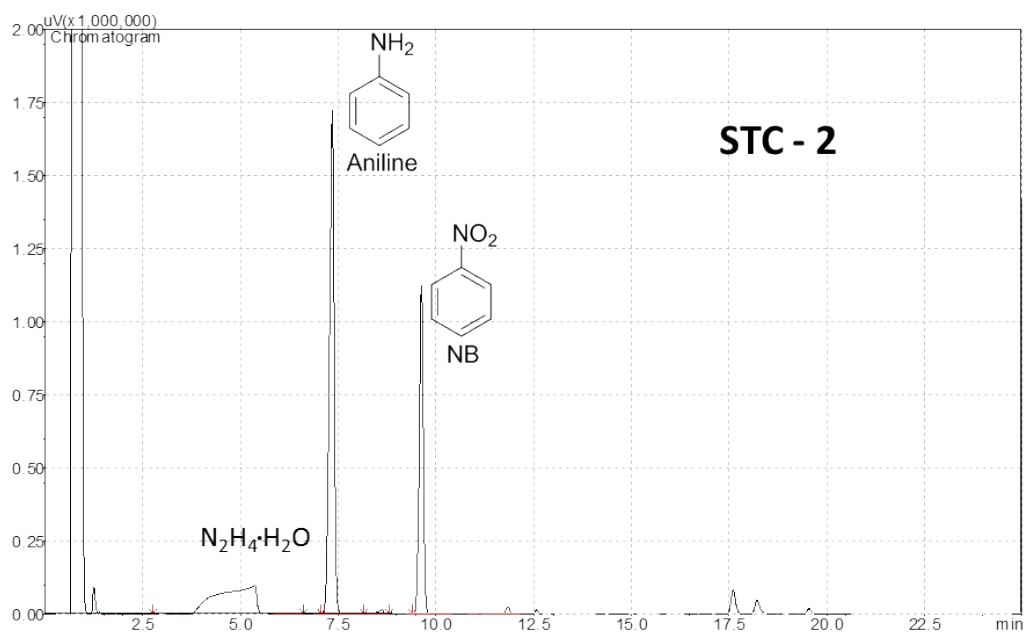

**Figure S13.** GC chromatogram for reaction mixture treated with STC 2

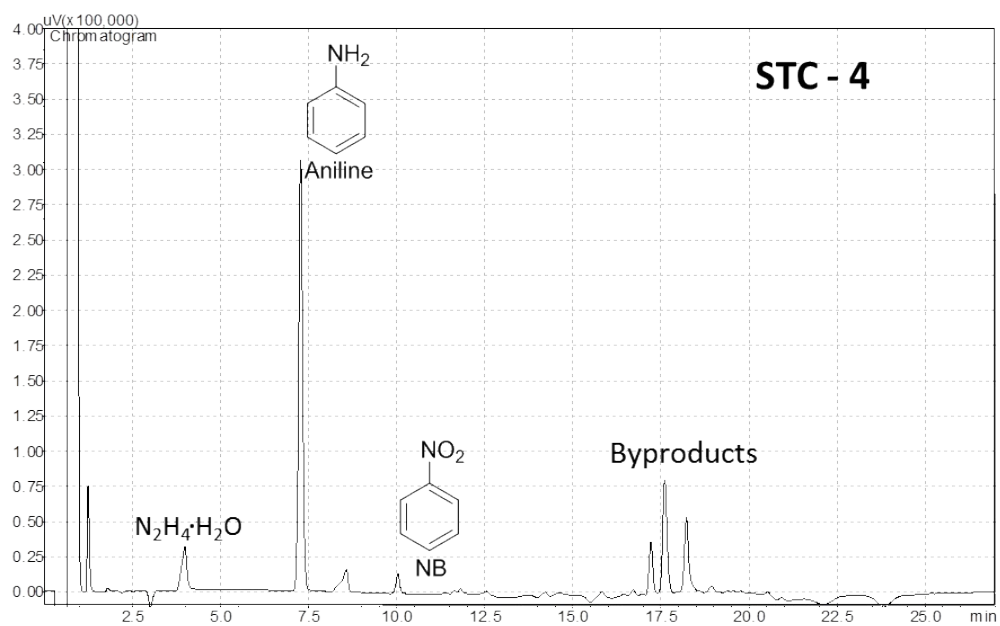

Figure S14. GC chromatogram for reaction mixture treated with STC 4

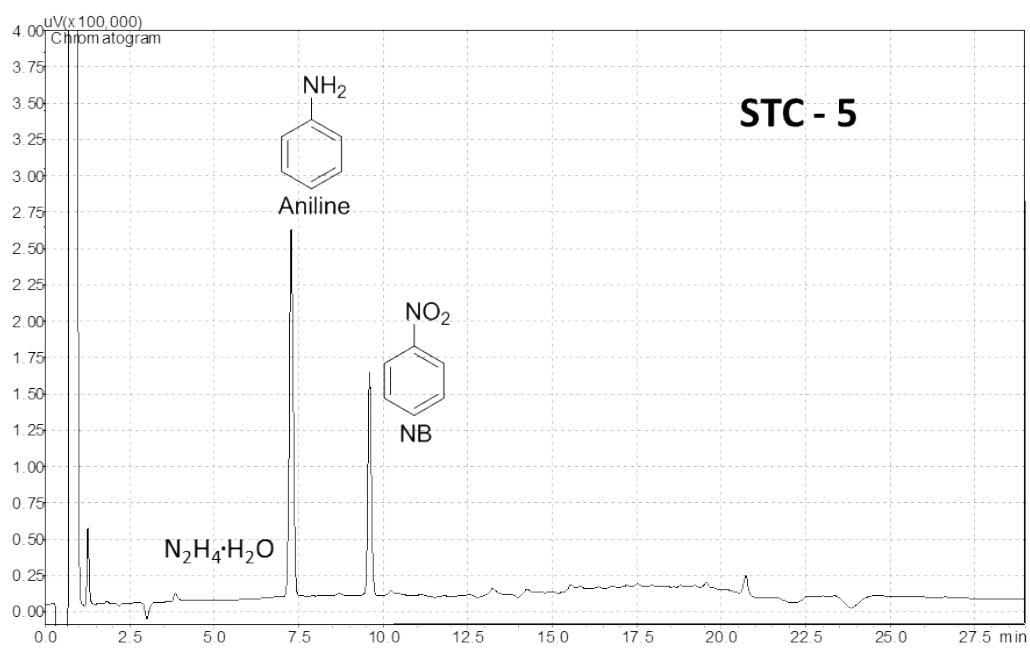

Figure S15. GC chromatogram for reaction mixture treated with STC 5

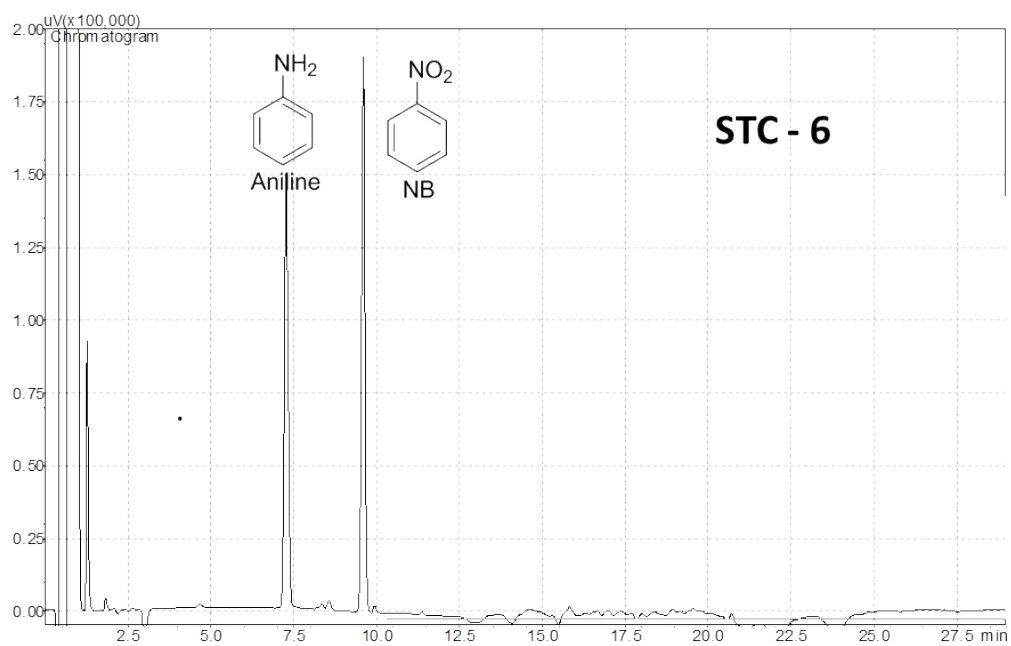

**Figure S16.** GC chromatogram for reaction mixture treated with STC 63

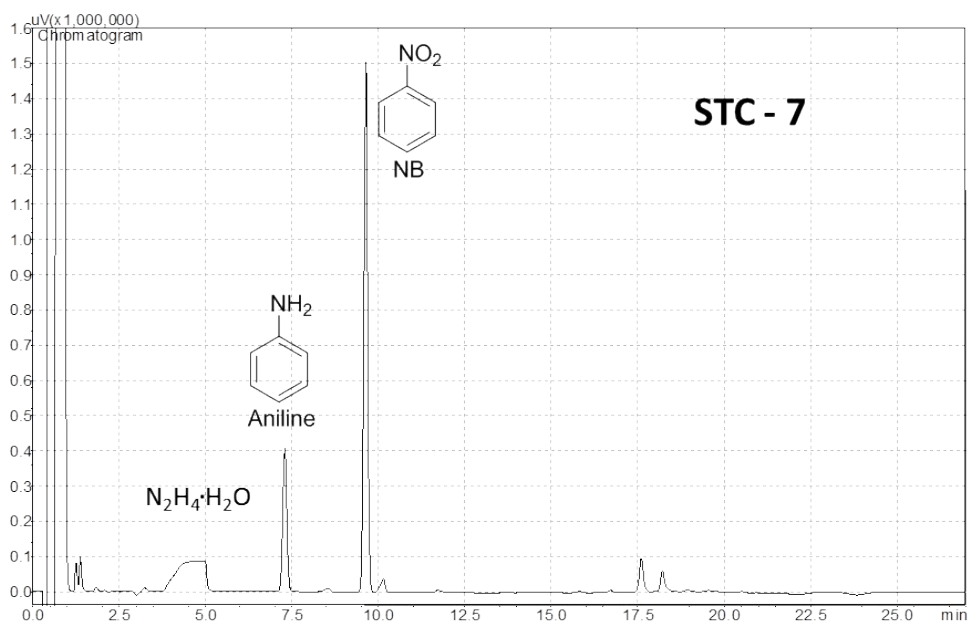

**Figure S17.** GC chromatogram for reaction mixture treated with STC 7

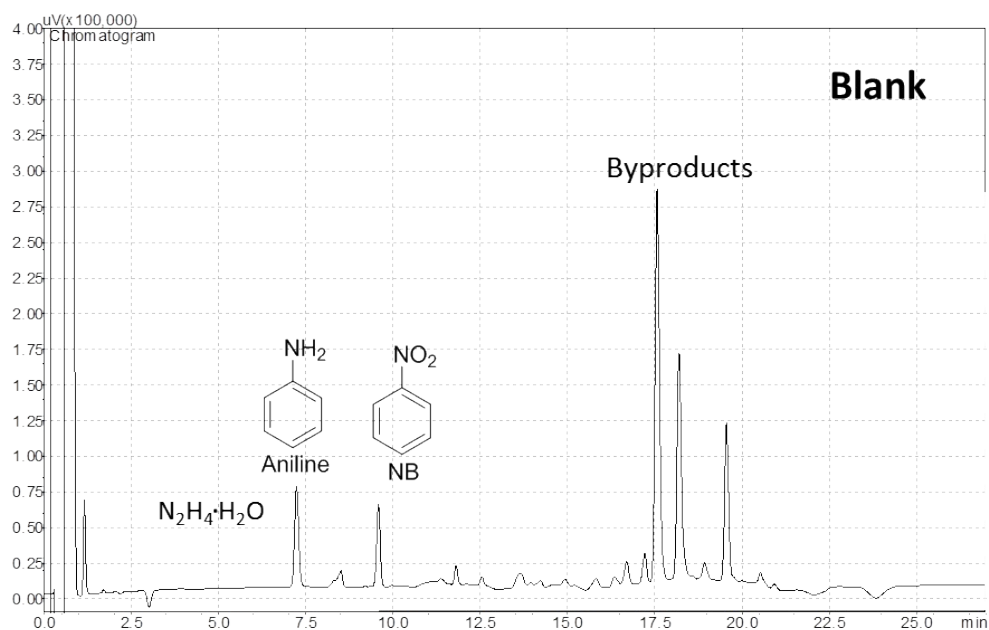

**Figure S18.** GC chromatogram for reaction mixture treated without catalyst

## Reference

1. (a) Wibowo, Edy, Mamat Rokhmat, and Mikrajuddin Abdullah. *Desalination* 409 (2017): 146-156. (b) Prasad, Anupama R., and Abraham Joseph. *RSC Advances* 7.34 (2017): 20960-20968.
2. Alatalo, Sara-Maaria, Ermei Mäkilä, Eveliina Repo, Markku Heinonen, Jarno Salonen, Edwin Kukk, Mika Sillanpää, and Maria-Magdalena Titirici. *Green Chemistry* 18, no. 4 (2016): 1137-1146.
3. Fan, Wei, Wei Gao, Chao Zhang, Weng Weei Tjiu, Jisheng Pan, and Tianxi Liu. *Journal of Materials Chemistry* 22, no. 48 (2012): 25108-25115.
4. Ai, Lunhong, and Lili Li. *Chemical engineering journal* 223 (2013): 688-695.
5. Zhou, Qi, Qiang Gao, Wenjun Luo, Chunjie Yan, Zinan Ji, and Ping Duan. *Colloids and Surfaces A: Physicochemical and Engineering Aspects* 470 (2015): 248-257.
6. Su, Dang Sheng, Guodong Wen, Shuchang Wu, Feng Peng, and Robert Schlögl. *Angewandte Chemie International Edition* 56, 2017, 936-964.
